# Supplementary material for: Transcriptional repression by a secondary DNA binding surface of DNA topoisomerase I safeguards against hypertranscription
Source: PubMed Central journal article supplement (PMC10576097; doi:10.1038/s41467-023-42078-9), 2023-10-13
Supplement: 41467_2023_42078_MOESM6_ESM.pdf [file 41467_2023_42078_MOESM6_ESM.pdf]

## Reporting Summary

Nature Portfolio wishes to improve the reproducibility of the work that we publish. This form provides structure for consistency and transparency in reporting. For further information on Nature Portfolio policies, see our [Editorial Policies](#) and the [Editorial Policy Checklist](#).

### Statistics

For all statistical analyses, confirm that the following items are present in the figure legend, table legend, main text, or Methods section.

| n/a                                 | Confirmed                                                                                                                                                                                                                                                                                      |
|-------------------------------------|------------------------------------------------------------------------------------------------------------------------------------------------------------------------------------------------------------------------------------------------------------------------------------------------|
| <input type="checkbox"/>            | <input checked="" type="checkbox"/> The exact sample size ( $n$ ) for each experimental group/condition, given as a discrete number and unit of measurement                                                                                                                                    |
| <input type="checkbox"/>            | <input checked="" type="checkbox"/> A statement on whether measurements were taken from distinct samples or whether the same sample was measured repeatedly                                                                                                                                    |
| <input type="checkbox"/>            | <input checked="" type="checkbox"/> The statistical test(s) used AND whether they are one- or two-sided<br><i>Only common tests should be described solely by name; describe more complex techniques in the Methods section.</i>                                                               |
| <input checked="" type="checkbox"/> | <input type="checkbox"/> A description of all covariates tested                                                                                                                                                                                                                                |
| <input type="checkbox"/>            | <input checked="" type="checkbox"/> A description of any assumptions or corrections, such as tests of normality and adjustment for multiple comparisons                                                                                                                                        |
| <input type="checkbox"/>            | <input checked="" type="checkbox"/> A full description of the statistical parameters including central tendency (e.g. means) or other basic estimates (e.g. regression coefficient) AND variation (e.g. standard deviation) or associated estimates of uncertainty (e.g. confidence intervals) |
| <input type="checkbox"/>            | <input checked="" type="checkbox"/> For null hypothesis testing, the test statistic (e.g. $F$ , $t$ , $r$ ) with confidence intervals, effect sizes, degrees of freedom and $P$ value noted<br><i>Give <math>P</math> values as exact values whenever suitable.</i>                            |
| <input checked="" type="checkbox"/> | <input type="checkbox"/> For Bayesian analysis, information on the choice of priors and Markov chain Monte Carlo settings                                                                                                                                                                      |
| <input checked="" type="checkbox"/> | <input type="checkbox"/> For hierarchical and complex designs, identification of the appropriate level for tests and full reporting of outcomes                                                                                                                                                |
| <input checked="" type="checkbox"/> | <input type="checkbox"/> Estimates of effect sizes (e.g. Cohen's $d$ , Pearson's $r$ ), indicating how they were calculated                                                                                                                                                                    |

*Our web collection on [statistics for biologists](#) contains articles on many of the points above.*

### Software and code

Policy information about [availability of computer code](#)

|                 |                                                                                                                                                                                                                                                                                                                                                                                                                                                                                                                                                                                                                                                                          |
|-----------------|--------------------------------------------------------------------------------------------------------------------------------------------------------------------------------------------------------------------------------------------------------------------------------------------------------------------------------------------------------------------------------------------------------------------------------------------------------------------------------------------------------------------------------------------------------------------------------------------------------------------------------------------------------------------------|
| Data collection | For molecular dynamic (MD) simulation- AMBER 18;<br>For structural modelling - PyMOL (version 1.3), PDB2PQR (version 1. 7);<br>For loop modelling- ModLoop web server (accessed on 6 Aug 2021);<br>For cell sorting- Summit (version 5.4) on Mo-Flo;<br>For flow cytometry- FACSDiva (version 9.8) on BD Symphony AS analyzer;<br>For microscopy imaging- FV31S-SW (version 2.4.I.198), Zen Blue (version 3.3.89.0000);<br>For RNA-seq, ChIP-seq and PRO-seq- Illumina HiSeq-2000 or Novaseq platforms;<br>For DNA gel image acquisition- Gel Doc XR+ (version 5.2);<br>For magnetic tweezer experiments - LabVIEW 2015;<br>For patch clamp- Clampex (version 10.7.0.3). |
| Data analysis   | For analysis of MD simulation- AMBER 18;<br>For visualization of structures and generation of figures- PyMOL version 1.3;<br>For visualization of MD simulations- VMD version 1.9.2.<br><br>For analysis of sequencing data, RNA-seq and ChIP-seq-<br>Trim Galore (version 0.4.2_dev); RSEM(version 1.1.11); DESeq2 (version 1.16.1) ; Bowtie2(version .2.2.9); SAMtools(version 1.4); deeptools (version 2.5.3); R (version 4.0.5); Integrative Genomics Viewer (IGV 2.10.2).<br><br>For PRO-seq analysis-<br>UMI-tools (version 1.1.4; DOI:10.1101/gr.209601.116); cutadapt (version 1.14; DOI:10.14806/ej.17.l.200) ; seqtk trimfq (version 1.3-r119-                 |

dirty; <https://github.com/lh3/seqtk>); bowtie2stdBedGraph.pl (version 1 <https://doi.org/10.5281/zenodo.5519915>); proTSScall (version 1; <https://doi.org/10.5281/zenodo.8298661>), make\_heatmap (version 1 <https://doi.org/10.5281/zenodo.5519915>).

For protein sequence alignment- PRALINE (<https://www.ibi.vu.nl/programs/pralinewww/>).

For cloning over-expression constructs- Benchling (<https://www.benchling.com>).

For statistical analysis - Jupyter (6.5.4), Prism (9.5.0).

For image analyses- Imaris (version 9.2).

For cell cycle analysis- FlowJo (version 10.8.2).

For DNA gel analysis- Image Lab (version 6.1).

For patch clamp analysis - pCLAMP (version 10.5)

For manuscripts utilizing custom algorithms or software that are central to the research but not yet described in published literature, software must be made available to editors and reviewers. We strongly encourage code deposition in a community repository (e.g. GitHub). See the Nature Portfolio [guidelines for submitting code & software](#) for further information.

## Data

Policy information about [availability of data](#)

All manuscripts must include a [data availability statement](#). This statement should provide the following information, where applicable:

- Accession codes, unique identifiers, or web links for publicly available datasets
- A description of any restrictions on data availability
- For clinical datasets or third party data, please ensure that the statement adheres to our [policy](#)

The MD simulation input files and processed output trajectories have been deposited in Zenodo and are available at <https://doi.org/10.5281/zenodo.8158854>. The raw and processed sequencing data generated in this study have been deposited in the NCBI Gene Expression Omnibus (GEO) under accession number GSE207163 [<https://www.ncbi.nlm.nih.gov/geo/query/acc.cgi?acc=GSE207163>]. The crystal structures PDB code 1A36 and PDB code 3M4A were retrieved from Protein Data Bank [[www.wwpdb.org](http://www.wwpdb.org)]. Human hg19, mouse mm10 and fly dm6 reference genomes was obtained from GENCODE [<https://www.gencodegenes.org/>]. Molecular Signatures Database (MSigDB) was obtained from <https://www.gsea-msigdb.org/gsea/index.jsp>. All other data are available in the main article, Supplementary Information, and source data. Source data are provided with this paper.

## Research involving human participants, their data, or biological material

Policy information about studies with [human participants or human data](#). See also policy information about [sex, gender \(identity/presentation\), and sexual orientation](#) and [race, ethnicity and racism](#).

Reporting on sex and gender

N/A

Reporting on race, ethnicity, or other socially relevant groupings

N/A

Population characteristics

N/A

Recruitment

N/A

Ethics oversight

N/A

Note that full information on the approval of the study protocol must also be provided in the manuscript.

## Field-specific reporting

Please select the one below that is the best fit for your research. If you are not sure, read the appropriate sections before making your selection.

Life sciences  Behavioural & social sciences  Ecological, evolutionary & environmental sciences

For a reference copy of the document with all sections, see [nature.com/documents/nr-reporting-summary-flat.pdf](https://www.nature.com/documents/nr-reporting-summary-flat.pdf)

## Life sciences study design

All studies must disclose on these points even when the disclosure is negative.

Sample size

Sample sizes for each experiments are provided in the figures and corresponding figure legends. Samples sizes were determined based on common practices in the field. For example, see PMID: 37117180, PMID:28591571, PMID 34301855, PMID: 20164500, PMID:35914168.

Data exclusions

No data were excluded from the experiments.

Replication

All experiments are independently repeated two to three times. The observed biological effects of interest were consistent between replicates. Key conclusions in the paper were further replicated using independent methods, and through using additional cell line.

Randomization  No randomization was performed because no subjective process was involved in data collection and analyses.

Blinding  Blinding were not applicable because the results collected are quantitative in nature (i.e. not subjective), and samples for comparison were collected and analyzed under the same conditions.

## Reporting for specific materials, systems and methods

We require information from authors about some types of materials, experimental systems and methods used in many studies. Here, indicate whether each material, system or method listed is relevant to your study. If you are not sure if a list item applies to your research, read the appropriate section before selecting a response.

### Materials & experimental systems

| n/a                                 | Involvement in the study                                  |
|-------------------------------------|-----------------------------------------------------------|
| <input type="checkbox"/>            | <input checked="" type="checkbox"/> Antibodies            |
| <input type="checkbox"/>            | <input checked="" type="checkbox"/> Eukaryotic cell lines |
| <input checked="" type="checkbox"/> | <input type="checkbox"/> Palaeontology and archaeology    |
| <input checked="" type="checkbox"/> | <input type="checkbox"/> Animals and other organisms      |
| <input checked="" type="checkbox"/> | <input type="checkbox"/> Clinical data                    |
| <input checked="" type="checkbox"/> | <input type="checkbox"/> Dual use research of concern     |
| <input checked="" type="checkbox"/> | <input type="checkbox"/> Plants                           |

### Methods

| n/a                                 | Involvement in the study                           |
|-------------------------------------|----------------------------------------------------|
| <input type="checkbox"/>            | <input checked="" type="checkbox"/> ChIP-seq       |
| <input type="checkbox"/>            | <input checked="" type="checkbox"/> Flow cytometry |
| <input checked="" type="checkbox"/> | <input type="checkbox"/> MRI-based neuroimaging    |

## Antibodies

### Antibodies used

Antibody, Manufacturer, Catalog number  
 Rabbit polyclonal anti-TOP1 antibody, Bethyl, A302-590A  
 Rabbit polyclonal anti-RNA polymerase II CTD repeat YSPTSPS (PhosphoS2), Abcam, ab5095  
 Mouse monoclonal anti-HA.11 epitope Tag antibody, Biolegend, 901501  
 Mouse monoclonal anti-actin (C-4), Santa-Cruz, sc-47778  
 Rabbit polyclonal anti-AFF4, Proteintech, 14662-1-AP  
 Rabbit polyclonal anti-gamma H2A.X (phospho S139), Abcam, ab2893  
 Goat polyclonal anti-GFP, Abcam, ab6673  
 Alexa Fluor 594 Streptavidin, Thermofisher, S32356  
 Goat anti-Rabbit IgG HRP-Conjugated, Bethyl, A120-201P  
 Goat anti-Mouse IgG HRP-Conjugated, Bethyl, A90-516P  
 Donkey anti-Goat IgG (H+L) Secondary Antibody, Alexa Fluor 488 conjugate, Thermofisher, A11055  
 Donkey anti-Rabbit IgG (H+L) Secondary Antibody, Alexa Fluor 594 conjugate, Thermofisher, A21207

### Validation

Rabbit polyclonal anti-TOP1 antibody, Bethyl, A302-590A  
 This antibody is validated by manufacturer for immunoprecipitation and Western blot applications. The specificity of this antibody was further validated by us through Western blot comparing cell samples that over-expressed human TOP1 with control samples (Supplementary Fig. 2c), and mESCs treated with siRNAs against Top1 and non-targeting siRNAs (data not shown).

Rabbit polyclonal anti-RNA polymerase II CTD repeat YSPTSPS (PhosphoS2), Abcam, ab5095  
 This antibody has been used for ChIP in mouse samples in multiple publications (e.g. PubMed: 25735743, PubMed: 28234895). It is validated for Western blot by manufacturer.

Mouse monoclonal anti-HA.11 epitope Tag antibody, Biolegend, 901501  
 The specificity of this antibody is validated by us through Western blot comparing cell samples that over-expressed HA-tagged TOP1 with control (Supplementary Fig. 2a).

Mouse monoclonal anti-actin (C-4), Santa-Cruz, sc-47778  
 This is a widely used antibody (with > 13k citations). This publication PMID: 2460261 reports the specificity of this clone against vertebrate actin.

Rabbit polyclonal anti-AFF4, Proteintech, 14662-1-AP  
 This antibody was validated by others for Western blot by using knockdown experiments in their publication (PMID: 27353326).

Rabbit polyclonal anti-gamma H2A.X (phospho S139), Abcam, ab2893  
 This antibody was validated by manufacturer for Western blot and immunofluorescence imaging by comparing samples treated with and without DNA damaging agents.

Goat polyclonal anti-GFP, Abcam, ab6673  
 This antibody was validated by manufacturer for IF through staining of transgenic mouse tissues with tissue-specific GFP expression.

## Eukaryotic cell lines

Policy information about [cell lines and Sex and Gender in Research](#)

|                                                                   |                                                                                                                                                       |
|-------------------------------------------------------------------|-------------------------------------------------------------------------------------------------------------------------------------------------------|
| Cell line source(s)                                               | 293T cells and E14 mouse embryonic stem cells were obtained from ATCC.                                                                                |
| Authentication                                                    | 293T cells were not authenticated by ATCC through STR profiling. E14 cells verified with based on morphology and pluripotent gene expression profile. |
| Mycoplasma contamination                                          | Cells were tested routinely for mycoplasma and are free of contamination at the point of our experiments.                                             |
| Commonly misidentified lines (See <a href="#">ICLAC</a> register) | No commonly misidentified cell lines were used in the study.                                                                                          |

## Plants

|                       |     |
|-----------------------|-----|
| Seed stocks           | N/A |
| Novel plant genotypes | N/A |
| Authentication        | N/A |

## ChIP-seq

### Data deposition

- Confirm that both raw and final processed data have been deposited in a public database such as [GEO](#).
- Confirm that you have deposited or provided access to graph files (e.g. BED files) for the called peaks.

Data access links  
*May remain private before publication.* Raw and processed sequencing data generated in this study have been deposited in the NCBI Gene Expression Omnibus (GEO) under accession number GSE207163 [<https://www.ncbi.nlm.nih.gov/geo/query/acc.cgi?acc=GSE207163>].

Files in database submission

```

ChIP-seq.mESC.RNAP2S2P_Mut.1_rep12.bw
ChIP-seq.mESC.RNAP2S2P_Mut.2_rep1.bw
ChIP-seq.mESC.RNAP2S2P_WT_rep12.bw
ChIP-seq.mESC.RNAP2S2P_WT_rep1.bw
ChIP-seq.mESC.TOP1_Mut.1_rep123.bw
ChIP-seq.mESC.TOP1_Mut.2.bw
ChIP-seq.mESC.TOP1_WT-matched-to-Mut.1_rep123.bw
ChIP-seq.mESC.TOP1_WT-matched-to-Mut.2.bw
ChIP-seq.mESC.TOP1_Mut.1_rep123.bed
ChIP-seq.mESC.TOP1_Mut.2.bed
ChIP-seq.mESC.TOP1_WT-matched-to-Mut.1_rep123.bed
ChIP-seq.mESC.TOP1_WT-matched-to-Mut.2.bed
ChIP-seq.mESC.RNAP2S2P_Mut.1_rep1_input_1.fastq.gz
ChIP-seq.mESC.RNAP2S2P_Mut.1_rep1_input_2.fastq.gz
ChIP-seq.mESC.RNAP2S2P_Mut.1_rep1_IP_1.fastq.gz
ChIP-seq.mESC.RNAP2S2P_Mut.1_rep1_IP_2.fastq.gz
ChIP-seq.mESC.RNAP2S2P_Mut.1_rep2_input_1.fastq.gz
ChIP-seq.mESC.RNAP2S2P_Mut.1_rep2_input_2.fastq.gz
ChIP-seq.mESC.RNAP2S2P_Mut.1_rep2_IP_1.fastq.gz
ChIP-seq.mESC.RNAP2S2P_Mut.1_rep2_IP_2.fastq.gz
ChIP-seq.mESC.RNAP2S2P_Mut.2_rep1_input_1.fastq.gz
ChIP-seq.mESC.RNAP2S2P_Mut.2_rep1_input_2.fastq.gz
ChIP-seq.mESC.RNAP2S2P_Mut.2_rep1_IP_1.fastq.gz
ChIP-seq.mESC.RNAP2S2P_Mut.2_rep1_IP_2.fastq.gz
ChIP-seq.mESC.RNAP2S2P_WT_rep1_input_1.fastq.gz
ChIP-seq.mESC.RNAP2S2P_WT_rep1_input_2.fastq.gz
ChIP-seq.mESC.RNAP2S2P_WT_rep1_IP_1.fastq.gz
ChIP-seq.mESC.RNAP2S2P_WT_rep1_IP_2.fastq.gz
ChIP-seq.mESC.RNAP2S2P_WT_rep2_input_1.fastq.gz
ChIP-seq.mESC.RNAP2S2P_WT_rep2_input_2.fastq.gz
ChIP-seq.mESC.RNAP2S2P_WT_rep2_IP_1.fastq.gz
ChIP-seq.mESC.RNAP2S2P_WT_rep2_IP_2.fastq.gz
ChIP-seq.mESC.TOP1_Mut.1_rep1_input.fastq.gz
ChIP-seq.mESC.TOP1_Mut.1_rep1_IP.fastq.gz
ChIP-seq.mESC.TOP1_Mut.1_rep2_input.fastq.gz
ChIP-seq.mESC.TOP1_Mut.1_rep2_IP.fastq.gz
ChIP-seq.mESC.TOP1_Mut.1_rep3_input.fastq.gz
ChIP-seq.mESC.TOP1_Mut.1_rep3_IP.fastq.gz
ChIP-seq.mESC.TOP1_Mut.2_input_1.fastq.gz

```

ChIP-seq.mESC.TOP1\_Mut.2\_input\_2.fastq.gz  
 ChIP-seq.mESC.TOP1\_Mut.2\_IP\_1.fastq.gz  
 ChIP-seq.mESC.TOP1\_Mut.2\_IP\_2.fastq.gz  
 ChIP-seq.mESC.TOP1\_WT-matched-to-Mut.1\_rep1\_input.fastq.gz  
 ChIP-seq.mESC.TOP1\_WT-matched-to-Mut.1\_rep1\_IP.fastq.gz  
 ChIP-seq.mESC.TOP1\_WT-matched-to-Mut.1\_rep2\_input.fastq.gz  
 ChIP-seq.mESC.TOP1\_WT-matched-to-Mut.1\_rep2\_IP.fastq.gz  
 ChIP-seq.mESC.TOP1\_WT-matched-to-Mut.1\_rep3\_input.fastq.gz  
 ChIP-seq.mESC.TOP1\_WT-matched-to-Mut.1\_rep3\_IP.fastq.gz  
 ChIP-seq.mESC.TOP1\_WT-matched-to-Mut.2\_input\_1.fastq.gz  
 ChIP-seq.mESC.TOP1\_WT-matched-to-Mut.2\_input\_2.fastq.gz  
 ChIP-seq.mESC.TOP1\_WT-matched-to-Mut.2\_IP\_1.fastq.gz  
 ChIP-seq.mESC.TOP1\_WT-matched-to-Mut.2\_IP\_2.fastq.gz

Genome browser session  
 (e.g. [UCSC](#))

N/A

## Methodology

### Replicates

Mut.1 and Mut.2 are independent mutant clones. ChIP experiments with Mut.2 are for replicating findings in Mut.1 in an independent cell line.  
 For RNAP2(S2P) ChIP, there are two biological replicates for Mut.1, one replicate for Mut.2, and two biological replicates for WT. For TOP1 ChIP, there are three biological replicates for the Mut.1 and WT pair, and one replicate for the Mut.2 and WT pair.

### Sequencing depth

sample total# of reads uniquely mapped reads read length sequencing type  
 ChIP-seq.mESC.RNAP2S2P\_Mut.1\_rep1\_input 49,757,885 35,453,333 150bp paired-end  
 ChIP-seq.mESC.RNAP2S2P\_Mut.1\_rep1\_IP 64,322,863 48,473,303 150bp paired-end  
 ChIP-seq.mESC.RNAP2S2P\_Mut.1\_rep2\_input 53,598,012 38,433,693 150bp paired-end  
 ChIP-seq.mESC.RNAP2S2P\_Mut.1\_rep2\_IP 66,250,432 50,979,552 150bp paired-end  
 ChIP-seq.mESC.RNAP2S2P\_Mut.2\_rep1\_input 53,914,652 39,140,343 150bp paired-end  
 ChIP-seq.mESC.RNAP2S2P\_Mut.2\_rep1\_IP 73,820,340 54,628,511 150bp paired-end  
 ChIP-seq.mESC.RNAP2S2P\_WT\_rep1\_input 47,390,329 34,306,104 150bp paired-end  
 ChIP-seq.mESC.RNAP2S2P\_WT\_rep1\_IP 84,113,446 63,657,088 150bp paired-end  
 ChIP-seq.mESC.RNAP2S2P\_WT\_rep2\_input 47,782,401 34,531,734 150bp paired-end  
 ChIP-seq.mESC.RNAP2S2P\_WT\_rep2\_IP 66,888,225 51,304,996 150bp paired-end  
 ChIP-seq.mESC.TOP1\_Mut.2\_input 50,344,436 36,974,396 150bp paired-end  
 ChIP-seq.mESC.TOP1\_Mut.2\_IP 55,659,686 38,841,328 150bp paired-end  
 ChIP-seq.mESC.TOP1\_WT-matched-to-Mut.2\_input 56,808,380 42,294,678 150bp paired-end  
 ChIP-seq.mESC.TOP1\_WT-matched-to-Mut.2\_IP 50,192,540 35,275,855 150bp paired-end  
 ChIP-seq.mESC.TOP1\_Mut.1\_rep1\_input 79,252,655 50,315,362 76bp single-end  
 ChIP-seq.mESC.TOP1\_Mut.1\_rep1\_IP 73,619,369 43,297,493 76bp single-end  
 ChIP-seq.mESC.TOP1\_WT-matched-to-Mut.1\_rep1\_input 81,714,705 55,145,784 76bp single-end  
 ChIP-seq.mESC.TOP1\_WT-matched-to-Mut.1\_rep1\_IP 65,225,128 41,843,131 76bp single-end  
 ChIP-seq.mESC.TOP1\_Mut.1\_rep2\_input 52,522,240 35,976,221 76bp single-end  
 ChIP-seq.mESC.TOP1\_Mut.1\_rep2\_IP 44,262,411 29,009,765 76bp single-end  
 ChIP-seq.mESC.TOP1\_Mut.1\_rep3\_input 44,514,503 30,909,368 76bp single-end  
 ChIP-seq.mESC.TOP1\_Mut.1\_rep3\_IP 57,141,709 37,134,006 76bp single-end  
 ChIP-seq.mESC.TOP1\_WT-matched-to-Mut.1\_rep2\_input 47,427,267 32,684,962 76bp single-end  
 ChIP-seq.mESC.TOP1\_WT-matched-to-Mut.1\_rep2\_IP 52,938,465 34,462,037 76bp single-end  
 ChIP-seq.mESC.TOP1\_WT-matched-to-Mut.1\_rep3\_input 51,118,381 35,382,877 76bp single-end  
 ChIP-seq.mESC.TOP1\_WT-matched-to-Mut.1\_rep3\_IP 47,682,826 30,868,142 76bp single-end

### Antibodies

Rabbit polyclonal anti-TOP1 antibody, Bethyl, A302-590A  
 Rabbit polyclonal anti-RNA polymerase II CTD repeat YSPTSPS (PhosphoS2), Abcam, ab5095

### Peak calling parameters

For single-end TOP1 ChIP dataset:  
 macs2 callpeak-t IP.rmdup.bam -c INPUT.rmdup.bam -f BAMPE -g mm --broad

For paired-end TOP1 ChIP dataset:  
 macs2 callpeak-t IP.rmdup.bam -c INPUT.rmdup.bam -f BAM -g mm --broad --keep-dup all  
 "keep-dup all" is used because the PCR duplicates have already been removed earlier in the pipeline.

### Data quality

Only unique reads with MAPQ >= 10 were kept; PCR duplicates and reads falling in blacklist regions were filtered out.

### Software

Trim Galore (v0.4.2\_dev); Bowtie2(v.2.2.9); SAMtools(v1.4); deeptools (v2.5.3); macs2(v2.1.1)

## Plots

Confirm that:

- The axis labels state the marker and fluorochrome used (e.g. CD4-FITC).
- The axis scales are clearly visible. Include numbers along axes only for bottom left plot of group (a 'group' is an analysis of identical markers).
- All plots are contour plots with outliers or pseudocolor plots.
- A numerical value for number of cells or percentage (with statistics) is provided.

## Methodology

Sample preparation

For RNA-seq and RNA content determination, transfected 293T cells were trypsinized, resuspended in complete media supplemented with DNaseI to prevent clumping, passed through a cell strainer (0.7  $\mu$ m) into FACS tube, and transported on ice to sort facility. 1  $\mu$ g/mL propidium iodide was added just before sorting to enable exclusion of dead cells in the sort.

For cell cycle analysis, transfected 293T cells were trypsinized and incubated in 20  $\mu$ g/mL Hoechst33342 in FACS buffer (1xPBS, 5% FBS) for 20 min at 37 deg C. After one wash with PBS, cells were resuspended in FACS buffer, passed through a cell strainer (0.7  $\mu$ m) into FACS tube, and transported on ice to FACS facility.

Instrument

Sorting was performed on Beckman-Coulter Mo-Flo Legacy Cell Sorter; FACS was performed on BD FACSymphony A5.2.

Software

Summit (Version 5.4) for cell sorter; FACSDiva (version 9.8) for flow cytometry data collection; FlowJo (Version 10.8.2) for cell cycle analysis.

Cell population abundance

Purity was determined by re-sorting a post-sort fraction. Purity is typically greater than 95%.

Gating strategy

Gating strategies were described in Supplementary Figures 9 and 10.

- Tick this box to confirm that a figure exemplifying the gating strategy is provided in the Supplementary Information.
